# Supplementary material
Source: Springer Nature journal article supplement (https://www.springermedizin.de/resource/supplementary/12889_2008_1292_MOESM1_ESM.pdf/9502882)
Supplement: MOESM1 [file 9502882]

|                         | <b>No snuff</b>                  | <b>Snuff use</b>                                |
|-------------------------|----------------------------------|-------------------------------------------------|
| <b>Daily smoke</b>      | I. Daily smokers N=1649          | IV. Combination of snuff with smoking<br>N=1199 |
| <b>Occasional smoke</b> | II. Occasional smokers<br>N=1822 |                                                 |
| <b>No smoke</b>         | V. No tobacco use<br>N=10128     | III. Snuff users<br>N=732                       |
